# Supplementary material
Source: publisher figshare collection journal article supplement (https://acs.figshare.com/ndownloader/files/4292269)
Supplement: Supplementary file 1 [file 4292269]

Supporting Information for

Kinetically Forbidden Transformations of Water

Molecular Assemblies in Hydrophobic Micropores

*Tomonori Ohba<sup>\*,†</sup> and Katsumi Kaneko<sup>‡</sup>*

Graduate School of Science, Chiba University, 1-33 Yayoi, Inage, Chiba 263-8522, Japan and Exotic

Nanocarbon Research Center, Shinshu University, 4-17-1 Wakasato, Nagano 380-8553, Japan

E-mail: ohba@pchem2.s.chiba-u.ac.jp

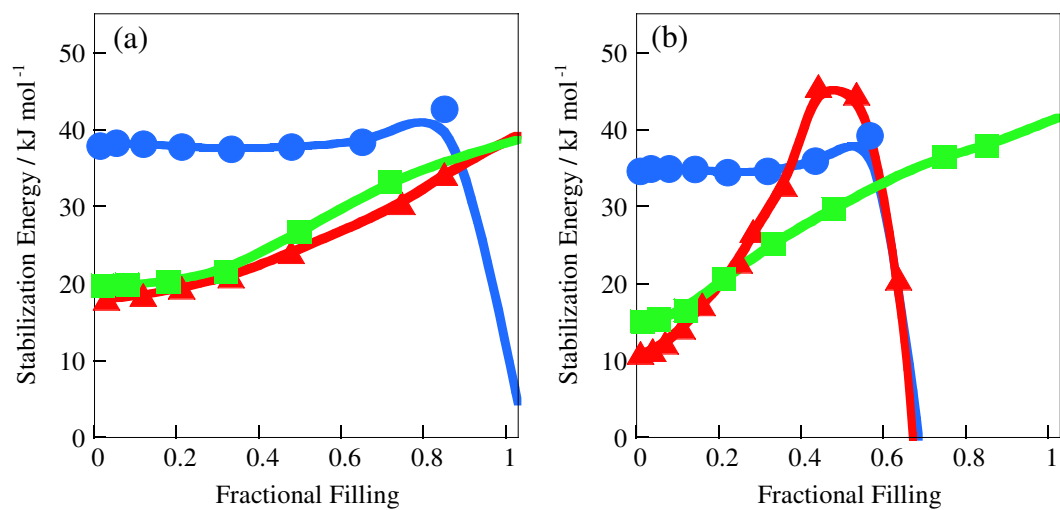

**Figure S1.** Stabilization energy as a function of fractional filling for  $w = 0.5$  (a) and  $1.5$  nm (b). Clusters: ●, monolayers: ▲, and uniform distribution structure: ■.

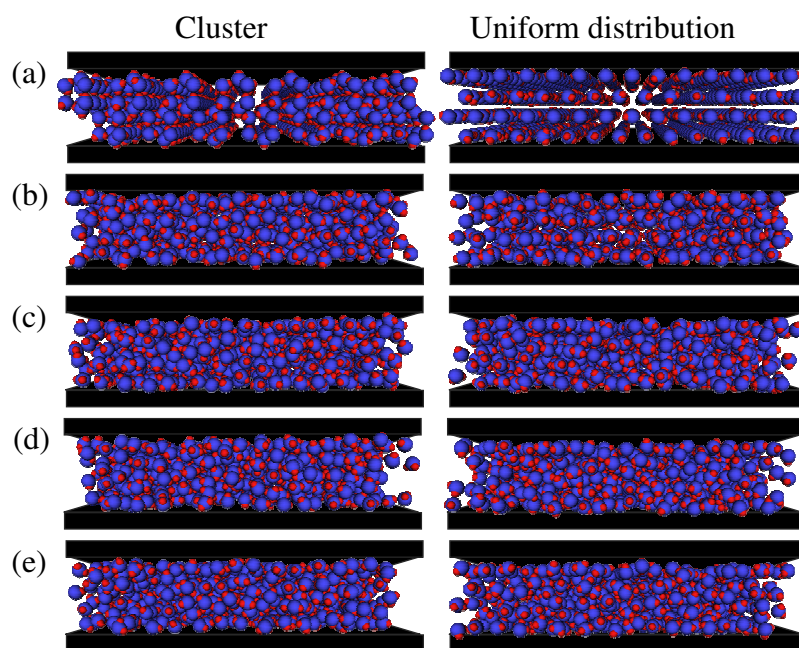

**Figure S2.** Snapshots showing the cluster–monolayer and uniform distribution structure–monolayer transformations at  $\phi = 0.6$  in the micropore of  $w = 1.1$  nm, as studied by MD simulation. Time scale = 0 (a), 1 (b), 2 (c), 3 (d), and 4 (e) ps.

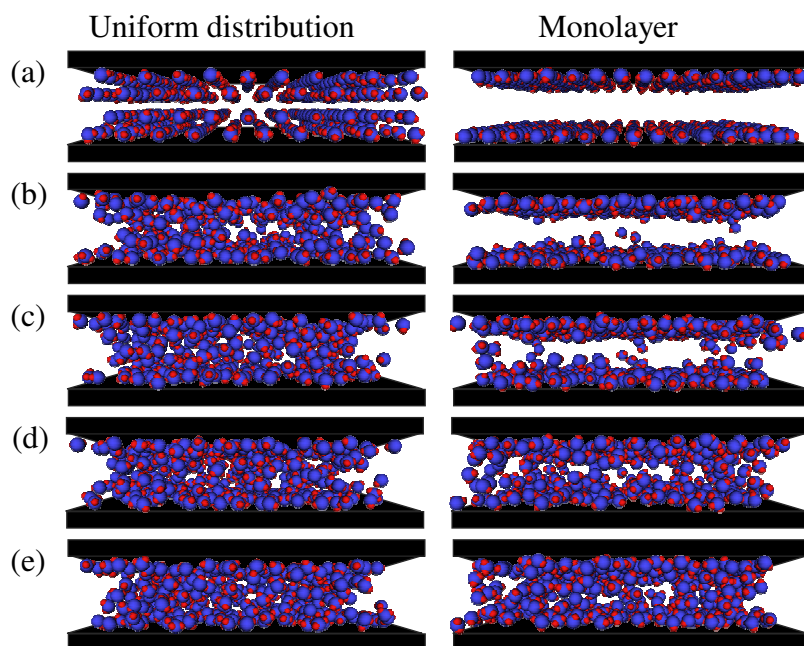

**Figure S3.** Snapshots showing the uniform distribution structure–cluster and monolayer–cluster transformations at  $\phi = 0.2$  in the micropore of  $w = 1.1$  nm, as studied by MD simulation. Time scale = 0 (a), 1 (b), 2 (c), 3 (d), and 4 (e) ps.
